# Supplementary material
Source: PubMed Central journal article supplement (PMC4155741)
Supplement: NIHMS586799-supplement-01.pdf [file NIHMS586799-supplement-01.pdf]

**Table S1.** Primers used: Sequences, amplicon sizes, and efficiencies

| <i>Gene</i> | <i>Forward sequence</i>    | <i>Reverse sequence</i>       | <i>Amplicon (bp)</i> | <i>Efficiency (%)</i> |
|-------------|----------------------------|-------------------------------|----------------------|-----------------------|
| ADAMTS4     | CTACAACCATCGCACGGA         | GCCTGGCAGGTGAGTT              | 108                  | 88                    |
| ADAMTS5     | TCTTCCATCCTAACCAGCATTG     | GGTGGCATCATAAGTCTGTCC         | 165                  | 98                    |
| ADAMTSL3    | CCAAGGACCCAAGGCATCGT       | TCTGACACACCTGCTTCTTCTCTG      | 134                  | 96                    |
| ADORA2A     | CGTGGTCCCTATGAACACTAC      | CCGCCAGGAAGATGC               | 101                  | 100                   |
| ANGPTL7     | GCTGTCACTTGGCTCTG          | AGTCCTTCTCCTGCTTCTTG          | 193                  | 94                    |
| APOE        | GGTGCAGACGCTGTCTGACCA      | CCTCCAACTCCGCCTTGTAGG         | 122                  | 90                    |
| AQP4        | CGACATGGTTCTCATCTCCCTTTG   | GAAGACAGACTTGCGCATGCT         | 148                  | 94                    |
| BCO2        | GCCCATTTGCTTATCTTCAGCCAGT  | TGCCGAAAGCCACAGCCATAGA        | 181                  | 95                    |
| BMP2        | GGACACCAGGTTAGTGAATCAGAACA | TGCTTCTCTTCCAAATGAGCCACT      | 135                  | 97                    |
| BMP4        | AAAGTCGCCGAGATTC           | ATTGTGCTCTTGCTAGG             | 134                  | 86                    |
| CABP5       | AAATGCGAGATGCCTTCAAAGA     | CTGCCTCCTGGACAACCT            | 138                  | 96                    |
| CAMP        | GAGGATGAGGACCCAGAC         | TCTCCAACCCGTTCTTCTT           | 118                  | 98                    |
| CDC42       | CCCGTGACCTGAAGGCTGTC       | ACACACCTGCGACTCTTCTTGGG       | 130                  | 98                    |
| CHAT        | AGGCACTGACTTTTCGTGAGAG     | CGGTCTGGGCTCGGATG             | 99                   | 96                    |
| CHRNA7      | GTACTIONCGCCAGCATCAT       | ACACCAGTTCAGCAGGA             | 133                  | 95                    |
| CILP        | GCCTTCTGTGACGACCAGTC       | GTAGGGCTGAGGGACACCAATA        | 132                  | 97                    |
| COL12A1     | CAGGTGTCCCGATCAAAGAG       | GCCTGGTGAATGGTGG              | 95                   | 97                    |
| COL6A6      | ATCAGCCACATCAATCAAGAG      | GATGAGGATGAGGAACTTCTT         | 195                  | 94                    |
| CYP26B1     | GCACTACCTGGACTGTGTCA       | CGCTGTGTCTGGGTATCTC           | 157                  | 95                    |
| CYR61       | TGGAACCTCGCATTCTGTATAACC   | GCCACAAGTGCACCTTAC            | 176                  | 97                    |
| DCN         | CTGCGTGCCCATGAGAACGAGATC   | GGTATCAGCAATGCGGATGTACGAAAGC  | 168                  | 96                    |
| DRD2        | CACGCACATCCTGAACATACA      | GTTGAAAGTGGTGTAGATGATGG       | 118                  | 91                    |
| EGF         | GGAGACGCCAGATAGAATAACG     | GACGATGTGCTCACCGAA            | 193                  | 95                    |
| EGR1        | TCCCTGACTACTGTTTCC         | AGTGGAGTGAGCGAAGG             | 112                  | 90                    |
| EPHA1       | GCCTCCTGGCAACTTC           | CACATCAATCCCAAAGC             | 136                  | 94                    |
| FAM180A     | AGACATTCGTCGCCTGAGT        | CTTCTGATAACCCGTGGGACAA        | 130                  | 94                    |
| FGFR1       | CCTGGAGGTCATCATCTACTGC     | AGAGTTCATGGAAGCACTGGAG        | 196                  | 99                    |
| FMOD        | TCCTGCTGGACCTGAG           | TTGTTGGTGAGGCTGTTAT           | 172                  | 96                    |
| GFRA1       | CGGCAAGGAGACCAACTT         | TTGTAGAGCGACTTCTGCTTC         | 96                   | 96                    |
| GRM5        | GCATCGCCCACTTACAAA         | CCATCAGCAGACCTCTCACT          | 144                  | 93                    |
| HIF1A       | ACTGGTTGCATCTCCGTCCTACTCA  | TCCTGCTCTGTTGGTGAGGCTGTC      | 109                  | 94                    |
| IGF2        | TGGCATTGTTGAAGAGTGTG       | GAAGCACGGTCGGAGAG             | 113                  | 100                   |
| IGF2R       | GTACTIONTGTGACGAGACCTCACC  | TGATTGCACTCAAAGTTTATGACTCTCA  | 96                   | 102                   |
| IL1B        | CAAGGAAGAAGATGGAGAAGCGATT  | GGCAGGTAGCTTGGTGAAGTC         | 182                  | 97                    |
| INSR        | AACGAGCGTCGGTCAATG         | ATCATCTCTTCCAGGGTAGGG         | 194                  | 92                    |
| LTBP1       | GGACGAGTGCCTGGAACC         | TGCTTGTGGTCTGGAGTTGG          | 111                  | 103                   |
| LTF         | GGCTCCAAGTACGCTGT          | GGGCAGTCAACACCCGTTTCTT        | 105                  | 97                    |
| MEST        | CAAAGATGGAGGTGTGCTGTC      | ACTGTAAGAGACTGTGATGACTAAG     | 179                  | 94                    |
| MMP14       | CCCTGGAACCTGGCTACCC        | ATAGGCTTTTCCATGGGCATCC        | 104                  | 96                    |
| MXRA5       | GGAAGGAAGGAGTGGATG         | GAGGCTGGAAGGTTACA             | 195                  | 93                    |
| NOS1        | ACATCACACGCCACCAA          | CCTCCAACACCTCCACGAT           | 159                  | 94                    |
| NOV         | CGAACAGACTACAGAGTGGAGTG    | TGTATTTCTTGGTGCAGGAGACA       | 191                  | 97                    |
| NRG1        | CGTGTCCAAGAAATGTCATCTCC    | GTGTGCCCATTGCTCCA             | 145                  | 97                    |
| NTS         | AATGTGAACAGCCAACCCGAG      | AACTCCCAGTGTGAAAGATCCTG       | 164                  | 95                    |
| NYX         | GTGAGCAGGTTACGAG           | GACAGCGAGGTGTTAGC             | 101                  | 96                    |
| OGN         | CTCTCCTTCTCTACCTGGACCACAAC | CTGAAGATGGATCACGCGCAGACTC     | 84                   | 96                    |
| OPN1LW      | ATGGTACCTGCTGTATC          | GGTGAAGGCGTAGC                | 232                  | 98                    |
| P2RY1       | ACGGCAGCATTTGTTC           | GGAGATCGCTACCACA              | 146                  | 97                    |
| PENK        | TCCTTGCCAAGCGATACG         | TCTTGCTCATTTCTTCGTCGTT        | 162                  | 98                    |
| PER2        | ACGACAACACATACACCGAAT      | GCACAGGCTCTGGATC              | 100                  | 92                    |
| PI15        | CCACTGACTCATCCCCGCCAACCC   | GTTTGCTGCTGGTGGGAACACTTTGC    | 176                  | 96                    |
| PRELP       | TTCCGCTGAACATAACAAGC       | GATCTGGTCCCGTTGATTTCT         | 182                  | 99                    |
| PTX3        | CTGTGTGGGCGGTGGCTTTG       | TCCATGTGGCTGAATCTCTGTGACTC    | 175                  | 94                    |
| RASGRF1     | GACTCTGACCCAGGAGGA         | AGCCTTGTCGAAGAACTC            | 185                  | 93                    |
| RLBP1       | CGTGCCAGGAAGTTCAA          | TGAAGAGCATGACCATC             | 184                  | 93                    |
| RPE65       | CACCCAGATGCCCTTGAAGAAGATGA | CTTCACTCAAGTCCCTTGGCGTTCAGA   | 115                  | 99                    |
| RXRβ        | CCTGACCTACTCGTGCC          | TACCGCCTCCCTCTTCA             | 118                  | 91                    |
| S100A12     | GAGCAAGATGGAAGATCACATGGAGG | TGAGGGTGTGGAAGTCCCTTTGTT      | 134                  | 100                   |
| SCUBE3      | CCGTCTCCATTACCACTTAC       | CTCGCAGATGTCTTCTACCA          | 184                  | 95                    |
| SERPINH1    | ACAAGAACAAGGACGAC          | GCACCAGGAAGATGAAG             | 186                  | 103                   |
| SOSTDC1     | GCGGTCCACCAAGTACATCT       | ATAGCCTCCTCCGATCCAGTTA        | 121                  | 97                    |
| SST         | CCAGACTCCGTCAGTTTCT        | CCAGGGCATCGTTCTCA             | 120                  | 93                    |
| TAC1        | CGGAGCCCTTCGAGCATCTTCTG    | CCCGTTTGCCCAATAATCCAAAGAATTGC | 81                   | 96                    |
| TGFB2       | GCAGAGTTTLAGGCTTTTCGTTTTG  | CTCGTGAACAGCATCAGTTACATC      | 189                  | 93                    |
| TGFB3       | ATCACCAATAACCCGCATCTAATCC  | CGCACACAGCAGTTCTCCTC          | 139                  | 90                    |
| TGFBI       | CCTCGGCACTCATCTCTCC        | GCAAATTCTTCATCTTGGCATCG       | 107                  | 94                    |
| THBS1       | CTGTCAGAACTCAGTACCATC      | CCACGGAGACCAGCCATC            | 136                  | 91                    |
| THBS2       | GAGACCGACTTCAGGAACCTC      | CGAAACCCACTGCGGATG            | 142                  | 100                   |
| TIMP2       | AGATGGGCTGTGAATGC          | CCGTGCTTCTCTTGTAT             | 151                  | 96                    |
| TIMP3       | CCGTGTCTATGATGGCAAGATG     | ACAAAGCAAGGCAGGTAATAGC        | 153                  | 99                    |
| TNC         | AGACGCCAAGACTCGCTACAG      | CAGGTTGACACGGTGACAGTTC        | 184                  | 94                    |
| TNMD        | GCTGGATGAGAGAGTTATTGT      | TGATGACACGACAGATGACC          | 137                  | 100                   |
| VDR         | AACCTGCACGAGGAGGAAC        | CTTCTGGATCATCTTGGCATAG        | 189                  | 93                    |
| VIP         | AACGAGTGAGCACCAACATCTC     | TCTTGACAGCCATTTGTTTCCCTAAGG   | 108                  | 94                    |
| VIPR1       | TCCACGCTGCTGCTGATTC        | CCCACGACCAGCTCAAAGAC          | 107                  | 99                    |
| VIPR2       | CCACGCACACCTCCTC           | CACTTCTCTTCAGCTCACT           | 127                  | 90                    |
| ZNF185      | GGAGGCGTCTGTACCTACTG       | GCAAATCCCACACCTAAAGCAAT       | 108                  | 97                    |
| POLR2A      | CTACCAGCCCCAAGTATTC        | GGTGAGTAAGTAGGAGACG           | 106                  | 98                    |
